# Supplementary material
Source: PubMed Central journal article supplement (PMC7494295)
Supplement: mmc1.pdf [file mmc1.pdf]

# THE LANCET Neurology

## Supplementary appendix

This appendix formed part of the original submission. We post it as supplied by the authors.

Supplement to: Cohen ME, Eichel R, Steiner-Birmanns B, et al. A case of probable Parkinson's disease after SARS-CoV-2 infection. *Lancet Neurol* 2020; **19**: 804–05.

## **A case of probable Parkinson's disease after SARS-CoV-2 infection**

*\*Mikhal E Cohen, Roni Eichel, Bettina Steiner-Birmanns, Amir Janah, Maxim Ioshpa, Rachel Bar-Shalom, Jefri J Paul, Hanaa Gaber, Volha Skrahina, Natan M Bornstein, Gilad Yahalom*

Department of Neurology (MEC, RE, BS-B, AJ, MI, NMB, GY) and Department of Nuclear Medicine (RB-S), Shaare Zedek Medical Center, Jerusalem, Israel; Faculty of Medicine, The Hebrew University of Jerusalem, Jerusalem, Israel (MEC, RE, BS-B, AJ, MI, NMB, GY); and CENTOGENE, Rostock, Germany (JJP, HG, VS)

|              |     |
|--------------|-----|
| Table 1..... | p 1 |
| Table 2..... | p 2 |

**Table 1: Routine blood and CSF test measures**

|            | Blood                    | CSF                            |
|------------|--------------------------|--------------------------------|
| Cell count | 5.2 k WBC/ $\mu$ l       | 6 WBC/ $\mu$ l                 |
|            | 261 k platelets/ $\mu$ l | 83.3 % mononuclear cells       |
|            | hemoglobin 14.5 g/dl     | 16.7 % polymorphonuclear cells |
| Chemistry  | glucose 91 mg/dl         | glucose 62 mg/dl               |
|            | sodium 142 mEq/l         | protein 43 mg/dl               |
|            | potassium 3.8 mEq/l      |                                |
|            | creatinine 0.9 md/dl     |                                |
|            | BUN 13 mg/dl             |                                |

**Table 2: Panel depicting the list of genes analyzed**

| Gene               | Name                                                                |
|--------------------|---------------------------------------------------------------------|
| <i>ADCY5</i>       | adenylate cyclase 5                                                 |
| <i>ANO3</i>        | Anoctamin 3                                                         |
| <i>APOE</i>        | Apolipoprotein E                                                    |
| <i>APP</i>         | Amyloid Beta Precursor Protein                                      |
| <i>ATP13A2</i>     | ATPase Cation Transporting 13A2                                     |
| <i>ATP1A3</i>      | ATPase Na <sup>+</sup> /K <sup>+</sup> Transporting Subunit Alpha 3 |
| <i>ATP9A</i>       | ATPase Phospholipid Transporting 9A                                 |
| <i>C19orf12</i>    | Chromosome 19 Open Reading Frame 12)                                |
| <i>CHCHD2</i>      | Coiled-Coil-Helix-Coiled-Coil-Helix Domain Containing 2             |
| <i>CNEP1R1</i>     | CTD nuclear envelope phosphatase 1 regulatory subunit 1             |
| <i>COX20</i>       | Cytochrome c oxidase assembly factor                                |
| <i>CTDNEP1</i>     | CTD Nuclear Envelope Phosphatase 1                                  |
| <i>DCTN1</i>       | Dynactin Subunit 1                                                  |
| <i>DJI (PARK7)</i> | Parkinsonism associated deglycase                                   |
| <i>DNAJC13</i>     | DnaJ Heat Shock Protein Family (Hsp40) Member C13                   |
| <i>DNAJC6</i>      | DnaJ Heat Shock Protein Family (Hsp40) Member C6                    |
| <i>ELOVL7</i>      | ELOVL Fatty Acid Elongase 7                                         |
| <i>FBXO47</i>      | F-Box Protein 47                                                    |
| <i>FBXO7</i>       | F-Box Protein 7                                                     |
| <i>GAK</i>         | Cyclin G Associated Kinase                                          |
| <i>GBA</i>         | Glucosylceramidase beta                                             |
| <i>GCDH</i>        | Glutaryl-CoA Dehydrogenase                                          |
| <i>GCH1</i>        | GTP Cyclohydrolase 1                                                |
| <i>GNAL</i>        | G Protein Subunit Alpha L                                           |
| <i>GNE</i>         | Glucosamine (UDP-N-Acetyl)-2-Epimerase/N-Acetylmannosamine Kinase   |
| <i>GRN</i>         | Granulin Precursor                                                  |
| <i>HPCA</i>        | Hippocalcin                                                         |
| <i>KCTD17</i>      | Potassium Channel Tetramerization Domain Containing 17              |
| <i>KMT2B</i>       | Lysine Methyltransferase 2B                                         |

|                 |                                               |
|-----------------|-----------------------------------------------|
| <i>LPIN1</i>    | Lipin 1                                       |
| <i>LPIN2</i>    | Lipin 2                                       |
| <i>LPIN3</i>    | Lipin 3                                       |
| <i>LRRK2</i>    | Leucine-rich repeat kinase 2                  |
| <i>MAPT</i>     | microtubule-associated protein tau            |
| <i>MCCC1</i>    | Methylcrotonoyl-CoA Carboxylase 1             |
| <i>MCOLN1</i>   | Mucolipin 1                                   |
| <i>NPC1</i>     | NPC Intracellular Cholesterol Transporter 1   |
| <i>PANK2</i>    | Pantothenate Kinase 2                         |
| <i>PARK2</i>    | Parkinson disease 2                           |
| <i>PDE8B</i>    | Phosphodiesterase 8B                          |
| <i>PDGFB</i>    | Platelet Derived Growth Factor Subunit B      |
| <i>PDGFRB</i>   | Platelet-derived growth factor receptor beta  |
| <i>PINK1</i>    | mitochondrial serine/threonine-protein kinase |
| <i>PLA2G6</i>   | Phospholipase A2 Group VI                     |
| <i>POLG</i>     | DNA polymerase subunit gamma                  |
| <i>SLC19A3</i>  | Solute Carrier Family 19 Member 3             |
| <i>SLC20A2</i>  | Solute Carrier Family 20 Member 2             |
| <i>SLC30A10</i> | Solute Carrier Family 30 Member 10            |
| <i>SLC39A14</i> | Solute Carrier Family 9 Member 14             |
| <i>SLC6A3</i>   | Solute Carrier Family 6 Member 3              |
| <i>SNCA</i>     | Synuclein Alpha                               |
| <i>SNCB</i>     | Synuclein Beta                                |
| <i>SYN1</i>     | Synapsin I                                    |
| <i>SYNJ1</i>    | Synaptojanin 1                                |
| <i>TAF1</i>     | TATA-Box Binding Protein Associated Factor 1  |
| <i>TDP43</i>    | TAR DNA binding protein 43                    |
| <i>THAP1</i>    | THAP Domain Containing 1                      |
| <i>TOR1A</i>    | Torsin Family 1 Member A                      |
| <i>VAC14</i>    | VAC14 Component Of PIKfyve Complex            |
| <i>VPS13C</i>   | Vacuolar Protein Sorting 13 Homolog C         |

|              |                                                 |
|--------------|-------------------------------------------------|
| <i>VPS35</i> | Vacuolar protein sorting-associated protein 35  |
| <i>XPR1</i>  | Xenotropic And Polytropic Retrovirus Receptor 1 |
